# Supplementary material for: Ubiquitin Degradation of the AICAR Transformylase/IMP Cyclohydrolase Ade16 Regulates the Sexual Reproduction of Cryptococcus neoformans
Source: MDPI journal article supplement (doi:10.3390/jof9070699), 2023-06-24
Supplement: s1 [file s1]

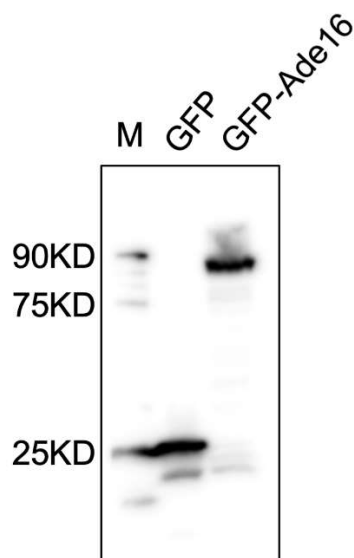

Figure S1. Detection of the GFP-Ade16 fusion proteins.

The expression of the GFP-Ade16 fusion protein in TBL308 was confirmed by Western blotting.

M: protein marker.

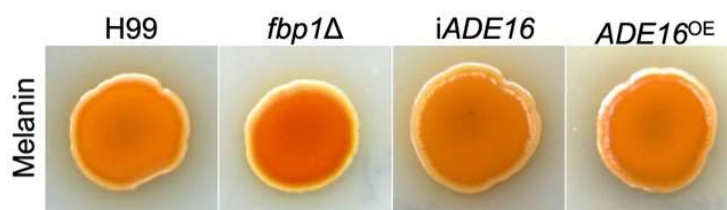

Figure S2. Ade16 is not involved in melanin production of *C. neoformans*.

Melanin production by the *C. neoformans* *ADE16* interference or overexpression strains was induced on Niger seed plates and photographed after incubation at 37°C for two days.

Table S1. Strains and plasmids used in this study

| Strains/plasmids     | Genotype/properties                                        | Source/reference     |
|----------------------|------------------------------------------------------------|----------------------|
| <i>E. coli</i>       |                                                            |                      |
| DH5α                 | cloning strain                                             |                      |
| <i>C. neoformans</i> |                                                            |                      |
| H99                  | <i>MATα</i>                                                | Perfect et al., 1993 |
| KN99a                | <i>MATa</i>                                                | Nielsen et al., 2003 |
| TBL3                 | <i>MATα fbp1Δ::NEO</i>                                     | In this study        |
| TBL81                | <i>MATα Fbp1-Flag::URA5</i>                                | In this study        |
| TBL248               | <i>MATα Fbp1-Flag::URA5 P<sub>CTR4</sub>-Ade16-HA::NAT</i> | In this study        |
| TBL264               | <i>MATα P<sub>CTR4</sub>-Ade16-HA::NAT</i>                 | In this study        |
| TBL265               | <i>MATα fbp1Δ::NEO P<sub>CTR4</sub>-Ade16-HA::NAT</i>      | In this study        |
| TBL270               | <i>MATα P<sub>CTR4</sub>-Ade16::NAT</i>                    | In this study        |
| TBL288               | <i>MATα P<sub>ACTIN</sub>-Ade16-HA::NAT</i>                | In this study        |

|                      |                                                                                                 |                    |
|----------------------|-------------------------------------------------------------------------------------------------|--------------------|
| TBL302               | <i>MATa P<sub>ACTIN</sub>-Ade16-HA::NAT</i>                                                     | In this study      |
| TBL308               | <i>MATa P<sub>H3</sub>-GFP-Ade16::NAT</i>                                                       | In this study      |
| TBL309               | <i>MATa P<sub>H3</sub>-GFP-Ade16::NAT</i>                                                       | In this study      |
| TBL310               | <i>MATa P<sub>ADE16</sub>-mCherry::NAT</i>                                                      | In this study      |
| TBL378               | <i>MATa P<sub>ADE16</sub>-mCherry::NAT</i>                                                      | In this study      |
| TBL414               | <i>MATa iADE16::NAT</i>                                                                         | In this study      |
| TBL415               | <i>MATa iADE16::NAT</i>                                                                         | In this study      |
| TBL445               | <i>MATa ADE16<sup>OE</sup>::NAT Nop1-mCherry::NEO</i>                                           | In this study      |
| TBL446               | <i>MATa ADE16<sup>OE</sup>::NAT Nop1-mCherry::NEO</i>                                           | In this study      |
| <i>S. cerevisiae</i> |                                                                                                 |                    |
| YS1                  | NMY32                                                                                           | In this study      |
| YS2                  | NMY32::AD-T7 BD-53                                                                              | In this study      |
| YS3                  | NMY32:: AD-T7 BD-LAM                                                                            | In this study      |
| YS5                  | NMY32:: AD-Fbp1 BD-Ade16                                                                        | In this study      |
| YS9                  | NMY32:: AD BD-Fbp1                                                                              | In this study      |
| YS16                 | NMY32:: AD BD-Ade16                                                                             | In this study      |
| YS17                 | NMY32:: AD-Ade16 BD-Fbp1                                                                        | In this study      |
| Plasmids             |                                                                                                 |                    |
| pCN19                | Amp <sup>r</sup> Plasmid harboring <i>GFP</i> under histone H3 promoter                         | Price et al., 2008 |
| pTBL5                | Amp <sup>r</sup> Plasmid harboring mCherry-GPD1 terminator and <i>NAT</i> marker                | In this study      |
| pTBL59               | amp <sup>r</sup> Vector for <i>P<sub>ACTIN</sub>-Nop1-mCherry-NEO</i> for nuclear positioning   | In this study      |
| pTBL100              | Kana <sup>r</sup> Vector for pGBKT7-FBP1 for yeast two-hybrid                                   | In this study      |
| pTBL106              | Amp <sup>r</sup> Vector for pGADT7-ADE16 for yeast two-hybrid                                   | In this study      |
| pTBL142              | Amp <sup>r</sup> Vector for pGADT7-FBP1 for yeast two-hybrid                                    | In this study      |
| pTBL145              | Kana <sup>r</sup> Vector for pGBKT7-ADE16 for yeast two-hybrid                                  | In this study      |
| pTBL149              | Amp <sup>r</sup> Vector for <i>P<sub>CTR4</sub>-ADE16-HA-NAT</i> for Ade16 stability assay      | In this study      |
| pTBL153              | Amp <sup>r</sup> Vector for <i>P<sub>ACTIN</sub>-Grp1-HA-NAT</i> for <i>GRP1</i> overexpression | In this study      |
| pTBL174              | Amp <sup>r</sup> Vector for <i>P<sub>ACTIN</sub>-Ade16-HA-NAT</i> for Ade16 overexpression      | In this study      |
| pTBL186              | Amp <sup>r</sup> Vector for <i>P<sub>H3</sub>-GFP-Ade16-NAT</i> for Ade16 localization          | In this study      |
| pTBL196              | Amp <sup>r</sup> Vector for <i>P<sub>ADE16</sub>-mCherry-NAT</i> for temporal expression assay  | In this study      |
| pTBL237              | Amp <sup>r</sup> Vector for <i>ADE16</i> RNAi                                                   | In this study      |

Table S2. PCR primers used in this study

| Primers | Description        | Sequence (5' -3')                 |
|---------|--------------------|-----------------------------------|
| TL17    | M13 F              | GTAAAACGACGGCCAG                  |
| TL18    | M13 R              | CAGGAAACAGCTATGAC                 |
| TL19    | <i>NEO</i> split F | GGGCGCCCGTTCTTTTGTCA              |
| TL20    | <i>NEO</i> split R | TTGGTGGTGAATGGGCAGGTAGC           |
| TL59    | <i>NEO</i> R4      | TGTGGATGCTGGCGGAGGATA             |
| TL67    | <i>STE20A</i> α F  | CCAAAAGCTGATGCTGTGGA              |
| TL68    | <i>STE20A</i> α R  | AGGACATCTATAGCAGAT                |
| TL69    | <i>STE20A</i> a F  | TCCACTGGCAACCCTGCGAG              |
| TL70    | <i>STE20A</i> a R  | ATCAGAGACAGAGGAGCAAGAC            |
| TL367   | <i>ADE16</i> KO F1 | ACATGACGAGCACAGCCAGTAGCA          |
| TL368   | <i>ADE16</i> KO R1 | CTGGCCGTCGTTTACGGTCGCCCCGCTCTCCAC |
| TL369   | <i>ADE16</i> KO F2 | TGCGAAGTGCTGGATAGATGAAGATG        |
| TL370   | <i>ADE16</i> KO R2 | AGACCCTTCACCCCGCTGTTACG           |
| TL371   | <i>ADE16</i> KO F3 | AGACCCTTCACCCCGCTGTTACG           |

---

|        |                                       |                                                   |
|--------|---------------------------------------|---------------------------------------------------|
| TL372  | <i>ADE16</i> KO R3                    | TCCACTGGGGGCTGCGAGGTAGGT                          |
| TL373  | <i>ADE16</i> KO F4                    | ATCTCGCTGCACTCTTCTCAAATA                          |
| TL572  | Fbp1-BD F                             | CCGAATTCCCGGGGATCCACATGCCCCGTACGACCGTCAAGAAGC     |
| TL573  | Fbp1-BD R                             | GTTATGCGGCCGCTGCAGTCAACGTCCGTTACCGAATCGTTG        |
| TL588  | Ade16-AD F                            | GGCATCGATACGGGATCCACATGTCTTCCGAGGCTCCTATCGGT      |
| TL589  | Ade16-AD R                            | ATTCATCTGCAGCTCGAGTTAATGGTGGAAGTGGAGATGATT        |
| TL879  | Fbp1-AD F                             | GGCATCGATACGGGATCCACATGCCCCGTACGACCGTCAAGAAGC     |
| TL880  | Fbp1-AD R                             | ATTCATCTGCAGCTCGAGTCAACGTCCGTTACCGAATCGTTG        |
| TL883  | Ade16-BD F                            | CCGAATTCCCGGGGATCCACATGTCTTCCGAGGCTCCTATCGGT      |
| TL884  | Ade16-BD R                            | GTTATGCGGCCGCTGCAGTTAATGGTGGAAGTGGAGATGATT        |
| TL893  | <i>P<sub>CTR4</sub></i> -Ade16-HA F1  | TCCTGCAGCCCCGGGGGATCCATGTCTTCCGAGGCTCCTATCGGT     |
| TL894  | <i>P<sub>CTR4</sub></i> -Ade16-HA R1  | ACGTCGTATGGGTAGGATCCATGGTGGAAGTGGAGATGATTG        |
| TL1036 | <i>ADE16 P<sub>CTR4</sub></i> REP F1  | TATCGGGCAGCAGAGGGCAGAG                            |
| TL1037 | <i>ADE16 P<sub>CTR4</sub></i> REP R1  | CTGGCCGTCGTTTTACGTGAGTGAACCACCACAGTCAGAT          |
| TL1034 | <i>ADE16 P<sub>CTR4</sub></i> REP F2  | GTCATAGCTGTTTCTTGCCAAATCAAGCTTATCGATGGTC          |
| TL1038 | <i>ADE16 P<sub>CTR4</sub></i> REP R2  | TCGTCGAGGGGAAGACCGACGG                            |
| TL1092 | <i>P<sub>ACTIN</sub></i> -Ade16-HA F1 | CGCCCAACATGTCTGGATCCATGTCTTCCGAGGCTCCTATCGGT      |
| TL1093 | <i>P<sub>ACTIN</sub></i> -Ade16-HA R1 | ACGTCGTATGGGTAGGATCCATGGTGGAAGTGGAGATGATTG        |
| TL1164 | GFP-Ade16 F                           | GACGAGCTGTACGGATCCATGTCTTCCGAGGCTCCTATCGGT        |
| TL1165 | GFP-Ade16 R                           | CTGGCGGCCGTTACTAGTTTAATGGTGGAAGTGGAGATGATT        |
| TL1166 | <i>P<sub>ADE16</sub></i> -mCherry F   | ACGGTATCGATAAGCTTCTGTTCTGTGATGGCGAGAGAACAT        |
| TL1167 | <i>P<sub>ADE16</sub></i> -mCherry R   | CTAGAACTAGTGGATCCGTTGCTTGATGTGGATGAGGTTG          |
| TL1248 | <i>ADE16</i> qRT-PCR F                | CAAGAAAGGCACCAAGCG                                |
| TL1249 | <i>ADE16</i> qRT-PCR R                | GGGGAAGGGGAAAAAGG                                 |
| TL1334 | <i>ADE16</i> Intro F                  | AACTCGCCCAACATGTCTGGATCCGTGAGTTGTTTCTCCCGC        |
| TL1335 | <i>ADE16</i> Intro R                  | CTACTGCTACTGTAACCCTTAATTAACTAGTCTGTTTGATGTCAAGAGG |
| TL1336 | <i>ADE16</i> (RNAi) 5'-3' F           | AACTCGCCCAACATGTCTGGATCCGGATGTTTCCAACATCACCA      |
| TL1337 | <i>ADE16</i> (RNAi) 5'-3' R           | GCGGGAGAAACAACCTACGGATCCGAAGTAATCACTGATAGCCTCG    |
| TL1340 | <i>ADE16</i> (RNAi) R                 | GGATAACGGAGAAAGAGGAAATCA                          |
| TL1467 | <i>ADE16</i> RNAi reverse F1          | CCTTAATTAAGGATGTTTCCAACATCACCA                    |
| TL1468 | <i>ADE16</i> RNAi reverse R1          | GGACTAGTTTAGAAGTAATCACTGATAGCCTCG                 |

---
